# Supplementary material
Source: PubMed Central journal article supplement (PMC3557015)
Supplement: 1214053110_pnas.201214053SI.pdf [file 1214053110_pnas.201214053SI.pdf]

# Supporting Information

Roberts-Galbraith and Newmark 10.1073/pnas.1214053110

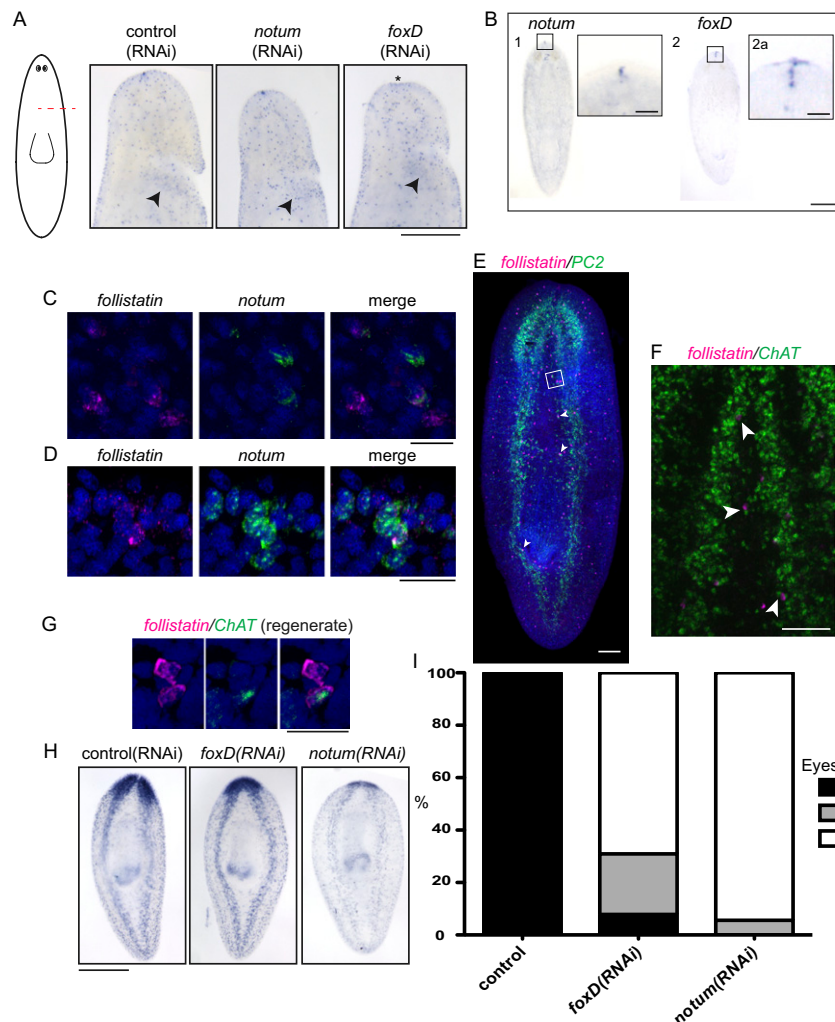

**Fig. S1.** Planarian *follistatin* expression in the head. (A) After control(RNAi), *notum*(RNAi), or *foxD*(RNAi), animals were cut as indicated in the diagram and were killed and fixed 6 h later. Animals were probed for *follistatin* expression by in situ hybridization (ISH), which revealed some up-regulation after injury in each treatment (arrowheads). Additionally, loss of *follistatin* expression at the anterior-most tip of the animal is visible after *foxD*(RNAi) treatment (asterisk). (B) Whole-mount in situ hybridization using *notum* and *foxD* probes. Both transcripts are expressed within a small number of cells in the tip of the head, visible in magnifications of boxed areas. (C) Double fluorescence in situ hybridization (FISH) with *follistatin* (magenta) and *notum* (green) probes. A double-positive cell is apparent in an animal 1 d after head amputation. Single-positive cells are also evident. (D) Double FISH of the anterior tip of an animal 2 d into head regeneration, showing cells expressing *follistatin* (magenta) and *notum* (green). (E) Whole-mount confocal microscopy image of FISH using *follistatin* and *prohormone convertase-2* (PC2) probes. The square indicates the region presented at higher magnification in Fig. 1C. Other adjacent PC2<sup>+</sup> and *follistatin*<sup>+</sup> cells are indicated with arrowheads. (F) *follistatin*- and *choline acetyltransferase* (ChAT)-expressing cells are also often adjacent (arrowheads), but *follistatin* and ChAT are not coexpressed. (G) Rarely observed colocalization of ChAT (green) and *follistatin* (magenta) transcripts in the same cell in a 3-d regenerating anterior end. ChAT transcript localization in the nucleus has previously been shown to occur in differentiating neurons (1). (H) *foxD*(RNAi) and *notum*(RNAi) animals display impaired cephalic ganglia regeneration 5 d after head amputation. The central nervous system is detected by in situ hybridization with a ChAT probe. (I) *foxD*(RNAi) and *notum*(RNAi) animals do not regenerate anterior structures properly. After 5 d of regeneration, negative-control animals have regenerated eyespots, but *foxD*(RNAi) and *notum*(RNAi) animals do not ( $n = 25$ ). [Scale bars, 500  $\mu$ m (A and H), 200  $\mu$ m (B), 20  $\mu$ m (C, D, and G), 100  $\mu$ m (E), and 50  $\mu$ m (B, Insets and F).] Anterior is up.

1. Wagner DE, Wang IE, Reddien PW (2011) Clonogenic neoblasts are pluripotent adult stem cells that underlie planarian regeneration. *Science* 332(6031):811–816.



uncut animals after long-term RNAi treatment using a *ChAT* probe. (F) Animals were fed RNAi for 70 d (every 6 d) and amputated pre- and post-pharyngeally. ISH of *ChAT* or *Wnt1* was performed on trunk pieces killed and fixed 6 d into head and tail regeneration. The cephalic ganglia did not regenerate in *folliculin(RNAi)* animals, but some ventral nerve cord regeneration is evident in the tail. *Wnt* transcript was not visible in the anterior blastema of *folliculin(RNAi)* animals by DAPI staining, but an expanded *Wnt1*-positive area was visible in the tail blastema after *folliculin(RNAi)*. (G) Control(RNAi) and *folliculin(RNAi)* planarians after 5 d of regeneration, stained with anti-phospho-histone H3 (red) and DAPI (blue). Failure of cephalic ganglia regeneration is evident in the *folliculin(RNAi)* animal by DAPI staining, but mitotic neoblasts are visible. [Scale bars, 500  $\mu$ m (B, C, E, and F), 2 mm (D), and 100  $\mu$ m (G).] Anterior is to the left (B, C, E, and F) or up (D and G).

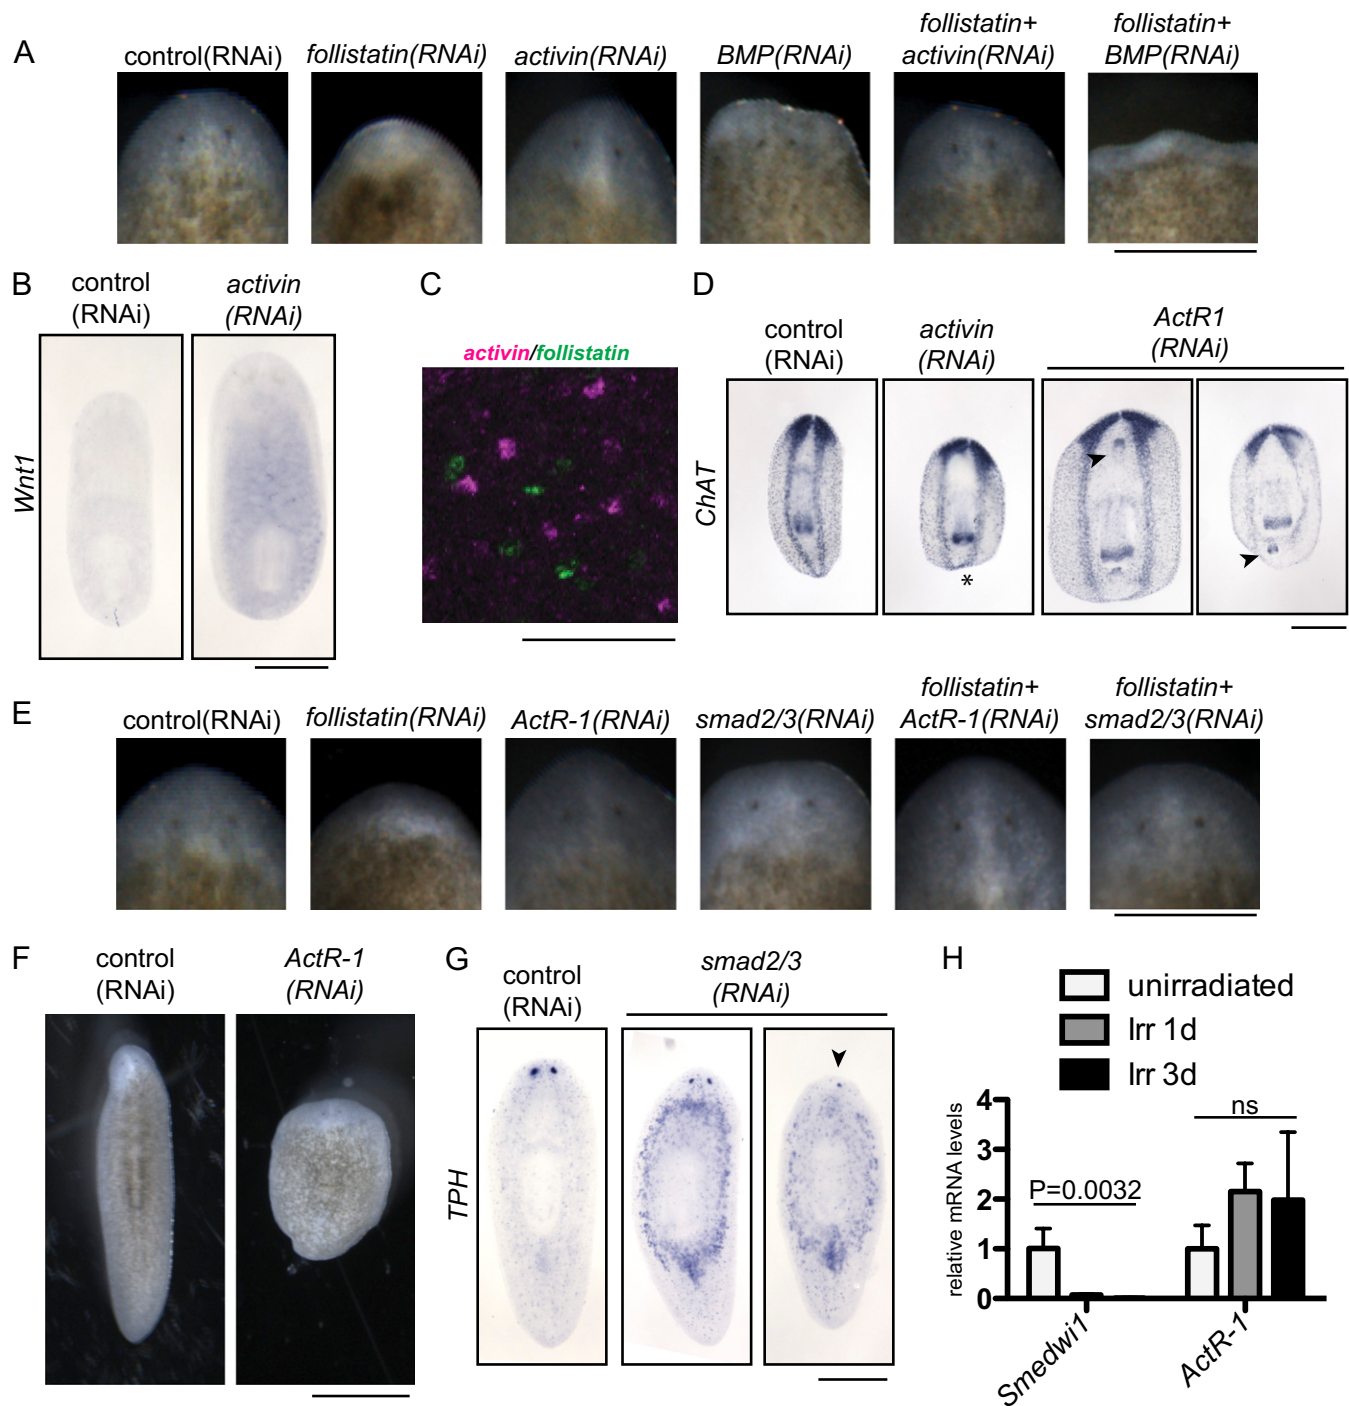

**Fig. S3.** Planarian *follistatin* inhibits *activin* upstream of an Activin receptor (*ActR-1*) and *smad2/3*. (A) Live animals with eyespots visible in an *activin* rescue experiment, quantitated in Fig. 3B. (B) After tail amputation, *activin*(RNAi) animals reestablish a smaller or absent *Wnt1*-expressing posterior region. (C) Double FISH illustrates that the punctate *activin* and *follistatin* expression patterns are not overlapping in a 2-d regenerate. (D) After amputation in front of and behind the pharynx, *activin*(RNAi) trunk fragments sometimes have a minor defect in tail regeneration, such as a notched tail (asterisk). Following head and tail amputation, *ActR-1*(RNAi) trunks sometimes regenerate an extra pharynx (arrowheads). The central nervous system and pharyngeal plexus are both visible using *ChAT* in situ hybridization. (E) Live animals from *ActR-1* and *smad2/3* rescue experiments, with eyespots quantitated in Fig. 3G. (F) *ActR-1*(RNAi) animals, imaged live, displayed a flattened behavior both before (not pictured) and after head amputation and regeneration. (G) *smad2/3*(RNAi) animals, subjected to in situ hybridization using a *TPH* (tryptophan hydroxylase) probe, regenerated eyespots and anterior regions with slightly reduced efficiency. Cyclopia was occasionally observed (arrowhead). (H) *ActR-1* transcript levels were evaluated by RT-quantitative PCR either in unirradiated animals or in animals 1 or 3 d after treatment with 100 Gy of gamma radiation. Significance was calculated using one-way ANOVA; ns, not significant. [Scale bars, 500  $\mu$ m (A, B, D, E, and G), 50  $\mu$ m (C), and 1 mm (F).] Anterior is up.

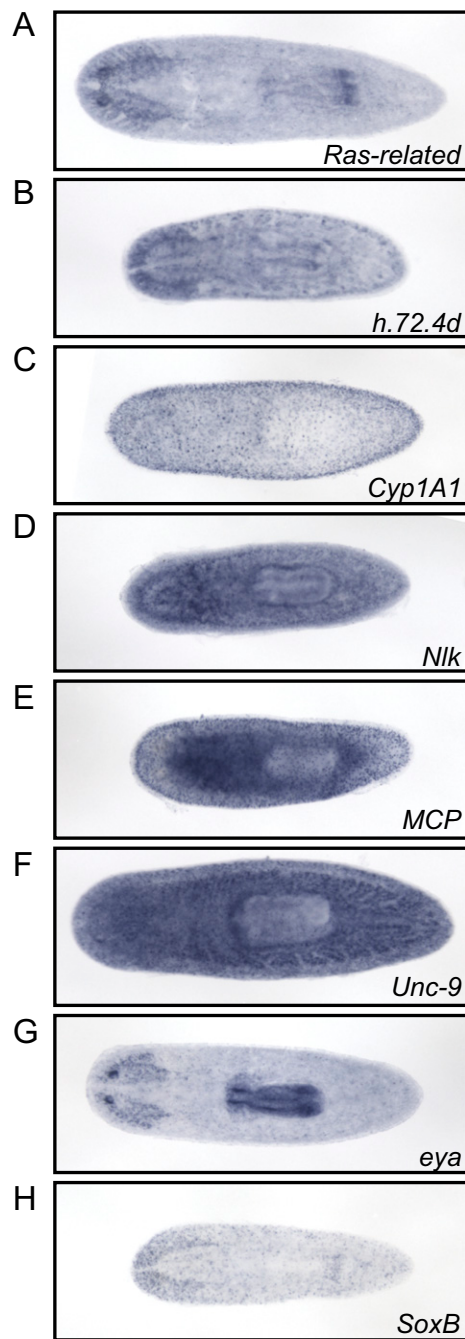

**Fig. S4.** Category 3 genes and neuronal transcription factors in planarians. Whole-mount in situ hybridization with *Ras-related* (A), *h.72.4d* (B), *Cyp1A1* (C), *nemo-like kinase* (*nlk*; D), *mitochondrial carrier protein* (*MCP*) (E), *Unc-9* (F), *eyes absent* (*eya*; G), or *SoxB* (H) probes. (Scale bar, 500  $\mu$ m.) Anterior is to the left.
